# Supplementary material for: A Predictive Clinical-Radiomics Nomogram for Survival Prediction of Glioblastoma Using MRI
Source: MDPI journal article supplement (doi:10.3390/diagnostics11112043), 2021-11-04
Supplement: s1 [file s1]

## Supplementary material

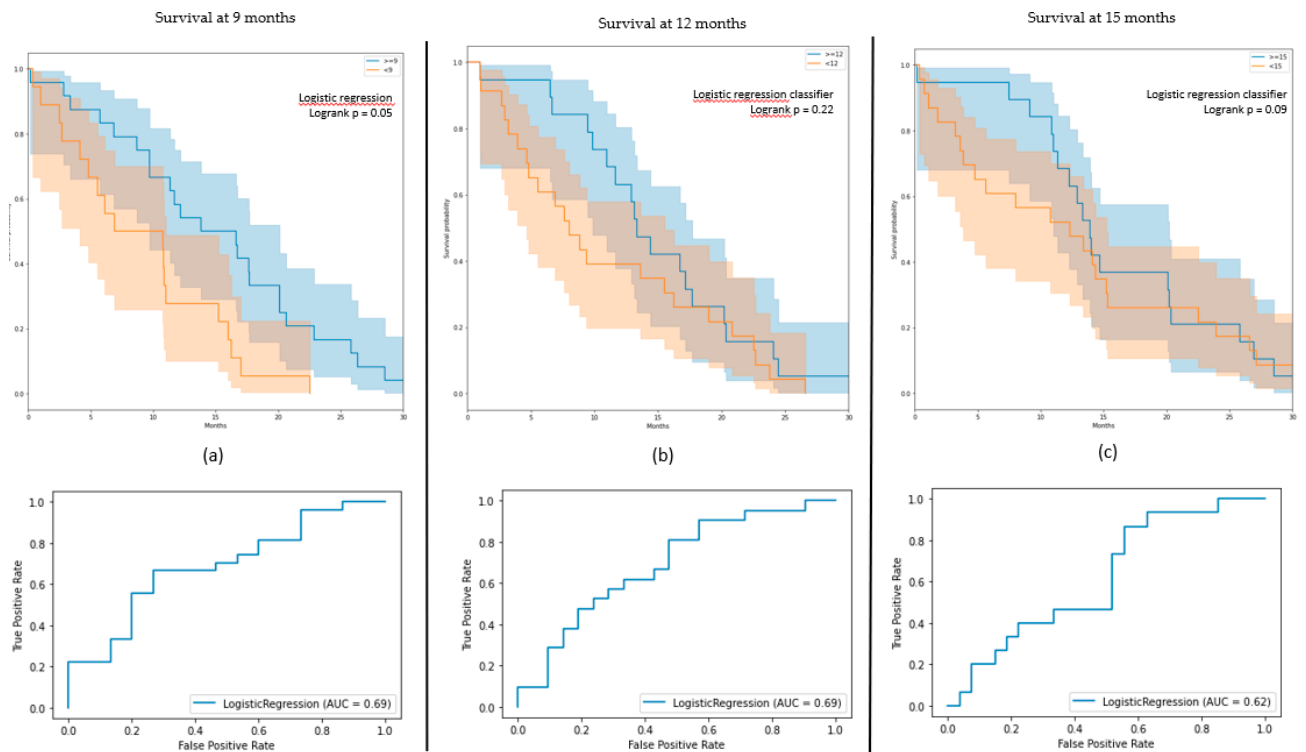

**Figure S1.** (a–c) Kaplan–Meier curves of the results on the test-sets for the 9-, 12-, and 15-month models using the age as the only feature; (d–f) receiver operating characteristic (ROC) curves of the results on the test-sets for the 9-, 12-, and 15-months models using the age as the only feature.

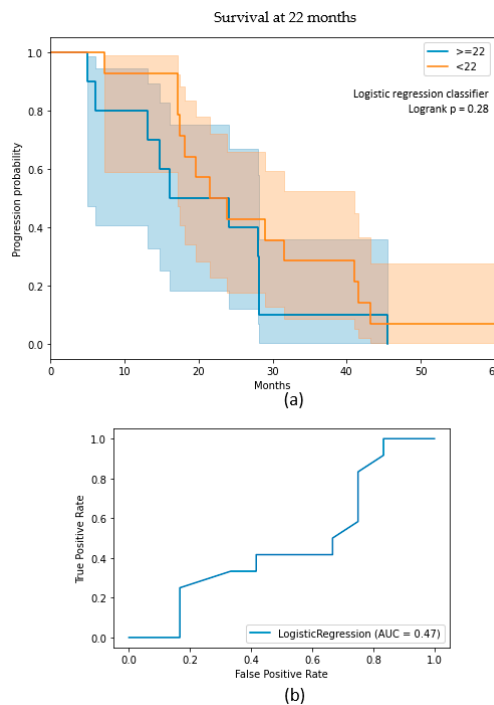

**Figure S2.** (a) Kaplan–Meier curve of the results on the test-set for the 22-months model using the age as the only feature; (b) receiver operating characteristic (ROC) curve of the results on the test-set for 22-months model using the age as the only feature.
